# Supplementary material
Source: publisher site journal article supplement (https://www.dovepress.com/article/360271)
Supplement: Supplementary file 1 [file get_supplementary_file.php]

Table A1

Subject demographics, anthropometric data, AiDA measurements and other lung function examination results. Values are presented as mean (SD), for non-smokers (Packyears=0), smokers (defined as having a value Packyears > 0) and men and women respectively.

|  | |  | Non-smokers | | | | | | |  | Smokers | | | |
| --- | --- | --- | --- | --- | --- | --- | --- | --- | --- | --- | --- | --- | --- | --- |
|  | |  | All | | | | Men | | Women |  | All | Men | | Women | |
| *n* | |  | 275 | | | | 140 | | 135 |  | 420 | 188 | | 232 | |
| **Characteristics** | |  |  | | | |  | |  |  |  |  | |  | |
| Age (years) | |  | 57.9 (4.5) | | | | 57.0 (4.3) | | 56.7 (4.5) |  | 57.8 (4.4) | 58.0 (4.6) | | 57.6 (4.3) | |
| Height (cm) | |  | 173 (10) | | | | 180 (7) | | 165 (7) |  | 170 (9) | 178 (7) | | 165 (6.2) | |
| Weight (kg) | |  | 81 (16) | | | | 89 (15) | | 73 (14) |  | 81 (17) | 90 (16) | | 74 (13) | |
| Waist (cm) | |  | 95 (13) | | | | 100 (12) | | 90 (13) |  | 97 (13) | 103 (12) | | 92 (12) | |
| Pack-years | |  | 0 | | | | 0 | | 0 |  | 17 (13) | 21 (15) | | 14 (10) | |
| **AiDA** | |  |  | | | |  | |  |  |  |  | |  | |
| *r*AiDA (µm) | |  | 284 (39) | | | | 285 (33) | | 282 (44) |  | 291 (43) | 298 (42) | | 286 (42) | |
| *R*0 (a.u.) | |  | 0.53 (0.21) | | | | 0.55 (0.19) | | 0.51 (0.23) |  | 0.47 (0.20) | 0.50 (0.19) | | 0.46 (0.21) | |
| **PFTs** | |  |  | | | |  | |  |  |  |  | |  | |
| FEV1 (L) | |  | 3.30 (0.78) | | | | 3.87 (0.58) | | 2.71 (0.46) |  | 3.04 (0.73) | 3.54 (0.70) | | 2.64 (0.47) | |
| VC (L) | |  | 4.22 (1.00) | | | | 4.97 (0.75) | | 3.46 (0.55) |  | 4.02 (0.90) | 4.72 (0.76) | | 3.45 (0.54) | |
| DLCO  (mmol L-1 s-1) | |  | 8.54 (1.67) | | | | 9.71 (1.29) | | 7.32 (1.00) |  | 7.85 (1.60) | 8.80 (1.60) | | 7.07 (1.12) | |
| FEV1/VC | |  | 0.78 (0.057) | | | | 0.78 (0.06) | | 0.78 (0.06) |  | 0.76 (0.077) | 0.75 (0.090) | | 0.77 (0.065) | |
| **IOS/FOT** | |  |  | | | |  | |  |  |  |  | |  | |
| R5  (kPa L-1 s) | |  | 0.33 (0.09) | | | | 0.30 (0.08) | | 0.36 (0.09) |  | 0.34 (0.09) | 0.31 (0.072) | | 0.37 (0.09) | |
| R5-R20  (kPa L-1 s) | |  | 0.033 (0.046) | | | | 0.035  (0.034) | | 0.032 (0.056) |  | 0.046 (0.044) | 0.047 (0.047) | 0.044 (0.043) | |
| X5  (kPa L-1 s) | |  | -0.086 (0.039) | | | | -0.068  (0.029) | | -0.10 (0.04) |  | -0.098 (0.046) | -0.080 (0.040) | -0.11 (0.04) | |
| AX (kPa L-1) | |  | 0.227 (0.23) | | | | 0.17 (0.18) | | 0.29 (0.26) |  | 0.31 (0.33) | 0.26 (0.34) | 0.34 (0.31) | |
| *f*res (Hz) | |  | 10.23 (3.0) | | | | 9.86 (2.97) | | 10.62 (2.99) |  | 11.25 (3.23) | 11.00 (3.44) | 11.45  (3.06) | |
| **CT** | |  |  | | | |  | |  |  |  |  |  | |
| Vol (L) | |  | 5.5 (1.4) | | | | 6.3 (1.3) | | 4.7 (8.8) |  | 5.36 (12.26) | 6.15 (1.18) | 4.72 (8.24) | |
| LAV (%) | |  | 5.98 (4.05) | | | | 7.51 (4.32) | | 4.38 (3.00) |  | 5.76 (4.17) | 7.19 (4.86) | 4.61 (3.07) | |
| PD15 (HU) | |  | -920 (23) | | | | -927 (19) | | -913 (24) |  | -918 (21) | -924 (21) | -914 (21) | |
|  | | |  |  |  | |  | | | | | | |
